# Supplementary material for: Branch Retinal Vein Occlusion: Treatment Outcomes According to the Retinal Nonperfusion Area, Clinical Subtype, and Crossing Pattern
Source: PubMed Central journal article supplement (PMC6483995; doi:10.1038/s41598-019-42982-5), 2019-04-25
Supplement: 41598_2019_42982_MOESM1_ESM.pdf [file 41598_2019_42982_MOESM1_ESM.pdf]

Branch Retinal Vein Occlusion:  
Treatment Outcomes  
According to the Retinal Nonperfusion Area,  
Clinical Subtype, and Crossing Pattern

Yuko Iida-Miwa, Yuki Muraoka, Yuto Iida,  
Sotaro Ooto, Tomoaki Murakami, Kiyoshi Suzuma,  
Akitaka Tsujikawa

## Supplemental figure 1 S1

How to measure the total NPA on a fluorescein angiography image.

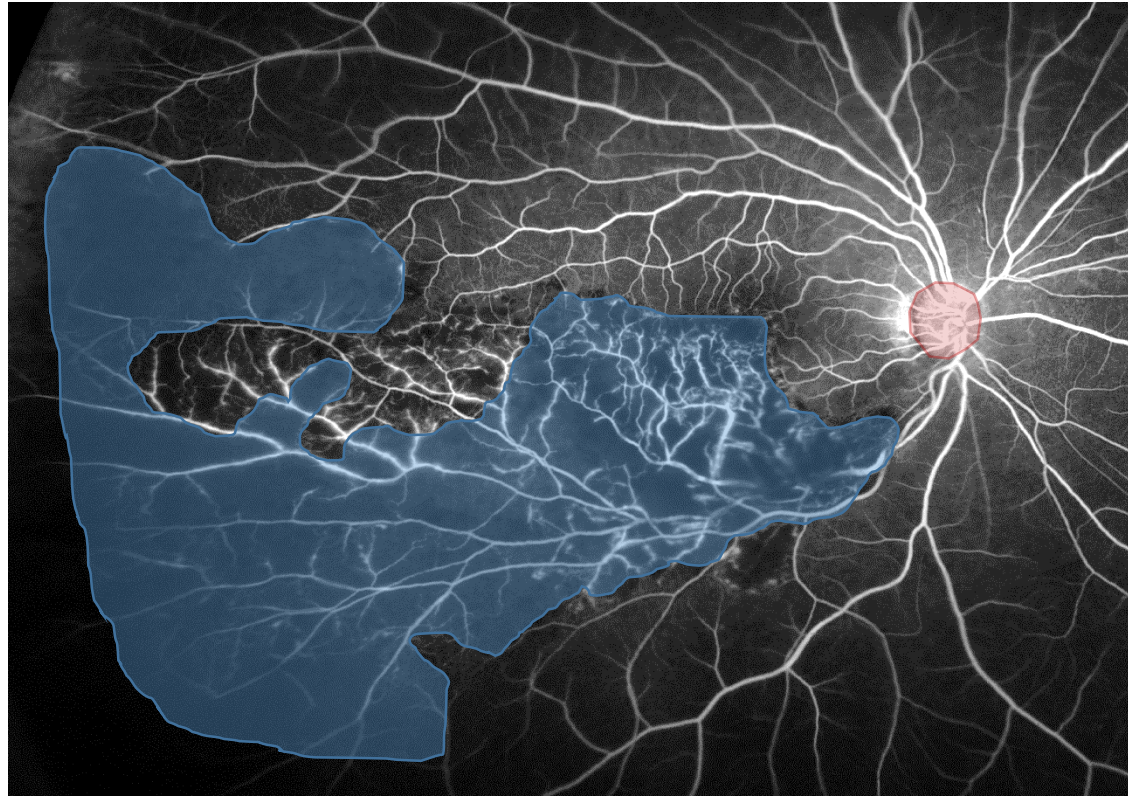

This is a representative case of acute BRVO.

On an image of ultra-widefield angiography obtained 1 minute after dye injection, we detected and measured total NPA (blue area) and disc area (DA) (red area) in pixels using a software plugin in the ImageJ program.
